# Supplementary material for: The Aging Process: A Metabolomics Perspective
Source: MDPI journal article supplement (doi:10.3390/molecules27248656), 2022-12-07
Supplement: s1 [file s1]

# **The Aging Process: A Metabolomics Perspective**

**Alex Castro <sup>1,\*</sup>, Étore F. Signini <sup>2</sup>, Juliana Magalhães De Oliveira <sup>1</sup>, Maria Carolina Bezerra Di Medeiros Leal <sup>1</sup>,**

**Patrícia Rehder-Santos <sup>2</sup>, Juliana C. Millan-Mattos <sup>2</sup>, Vinicius Minatel <sup>2</sup>, Camila B. F. Pantoni <sup>2</sup>, Regina V. Oliveira <sup>1</sup>, Aparecida M. Catai <sup>2</sup> and Antônio G. Ferreira <sup>1,\*</sup>**

<sup>1</sup> Department of Chemistry, Universidade Federal de São Carlos, 13565-905 São Carlos, Brazil

<sup>2</sup> Department of Physiotherapy, Universidade Federal de São Carlos, 13565-905 São Carlos, Brazil

\* Correspondence: ax.castro@yahoo.com.br (A.C.); giba@ufscar.br (A.G.F.).

**Supplementary Material**

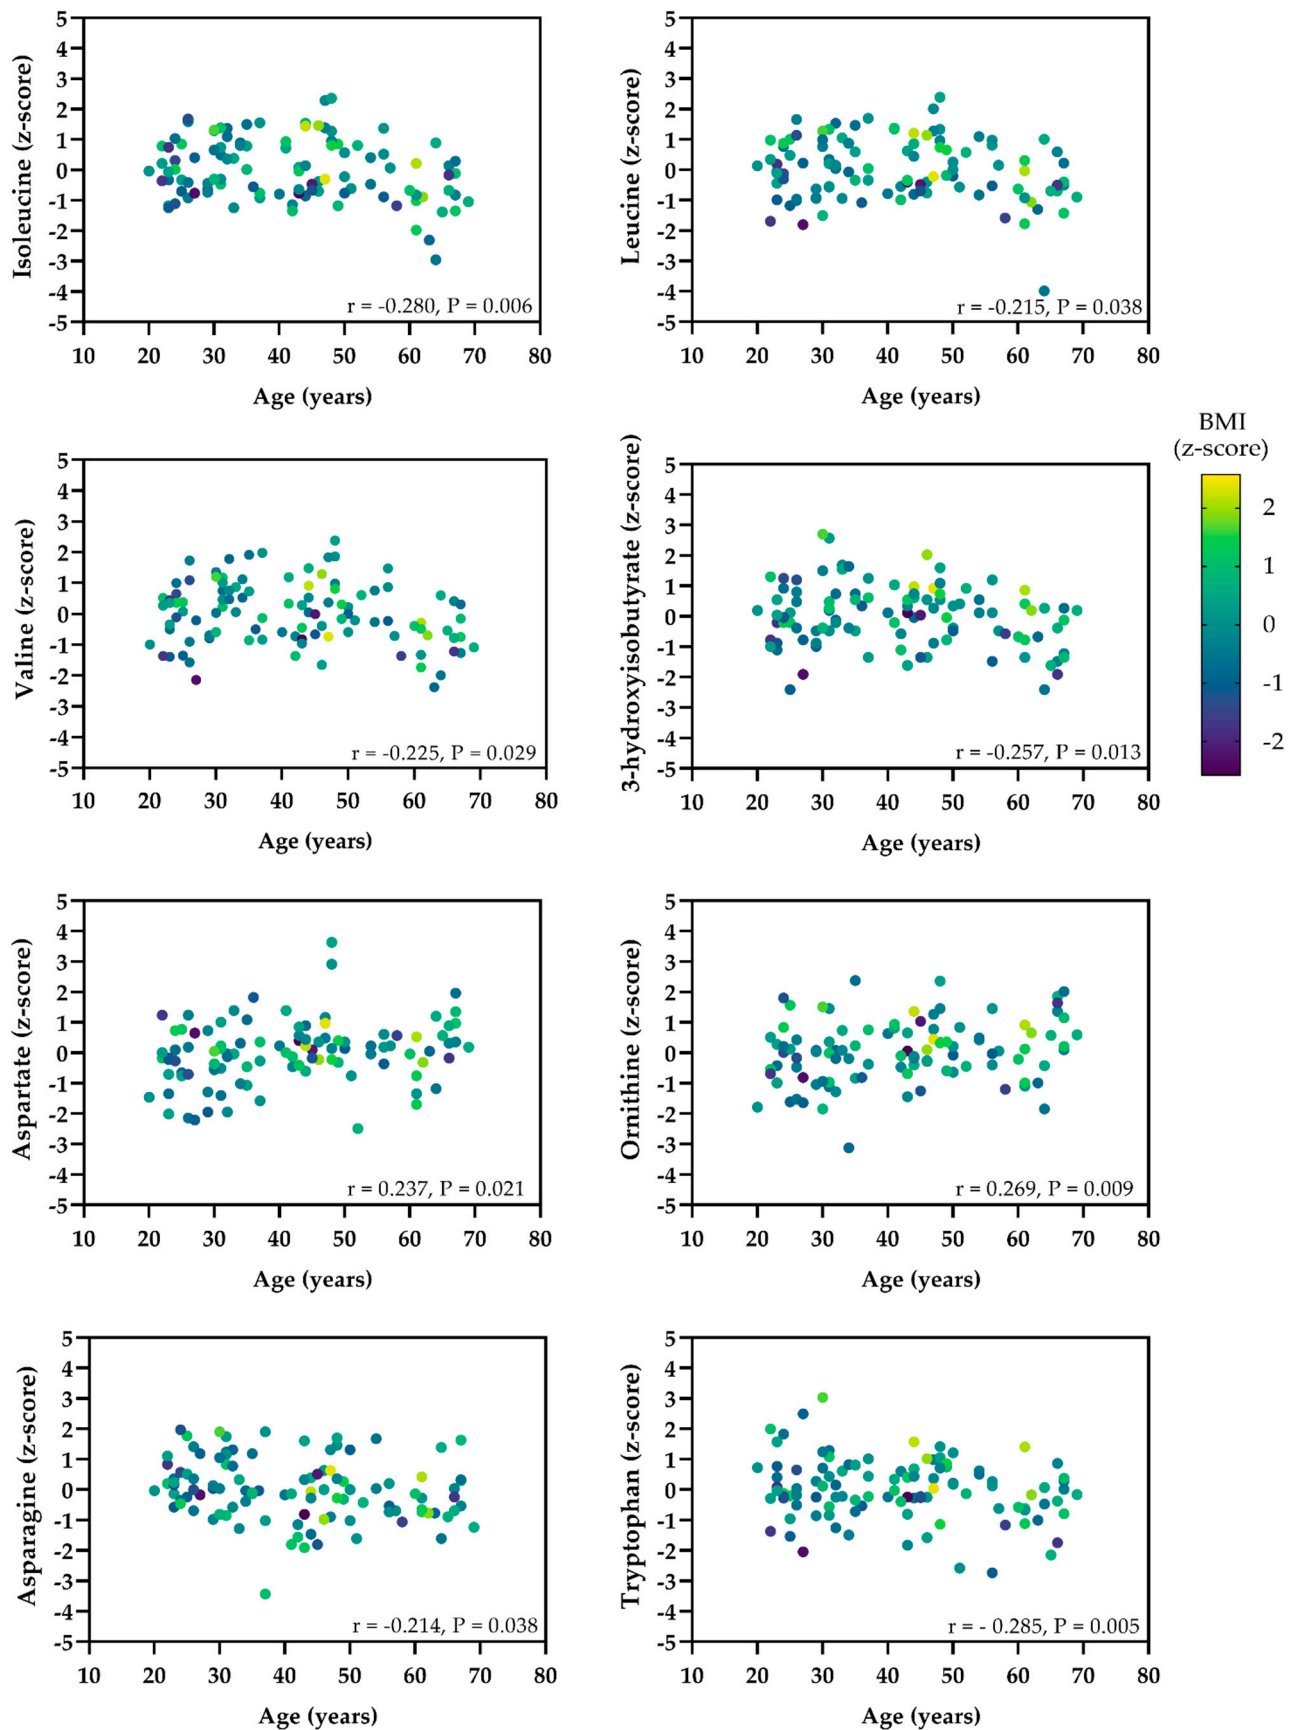

**Figure S1.** Scatter plots of the partial correlations (adjusted by body mass index - BMI) between age and metabolites levels (main findings). Metabolite levels were Box-Cox transformed and standardized to mean = 0 and multiples of 1 standard deviation (z-score). Blue and yellow colors represent low and high BMI values (z-score).

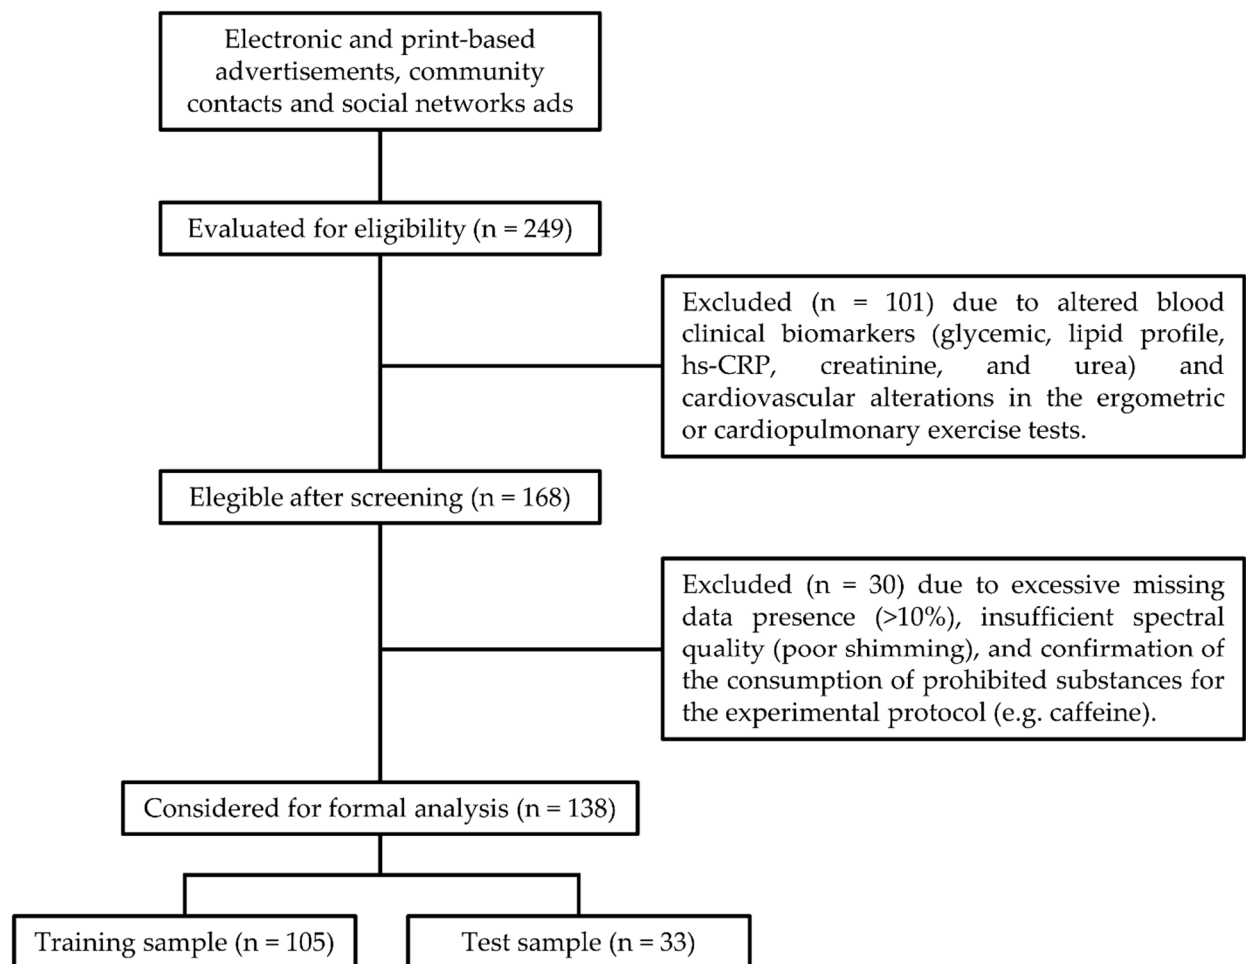

**Figure S2.** Flowchart describing the recruitment process of individuals.

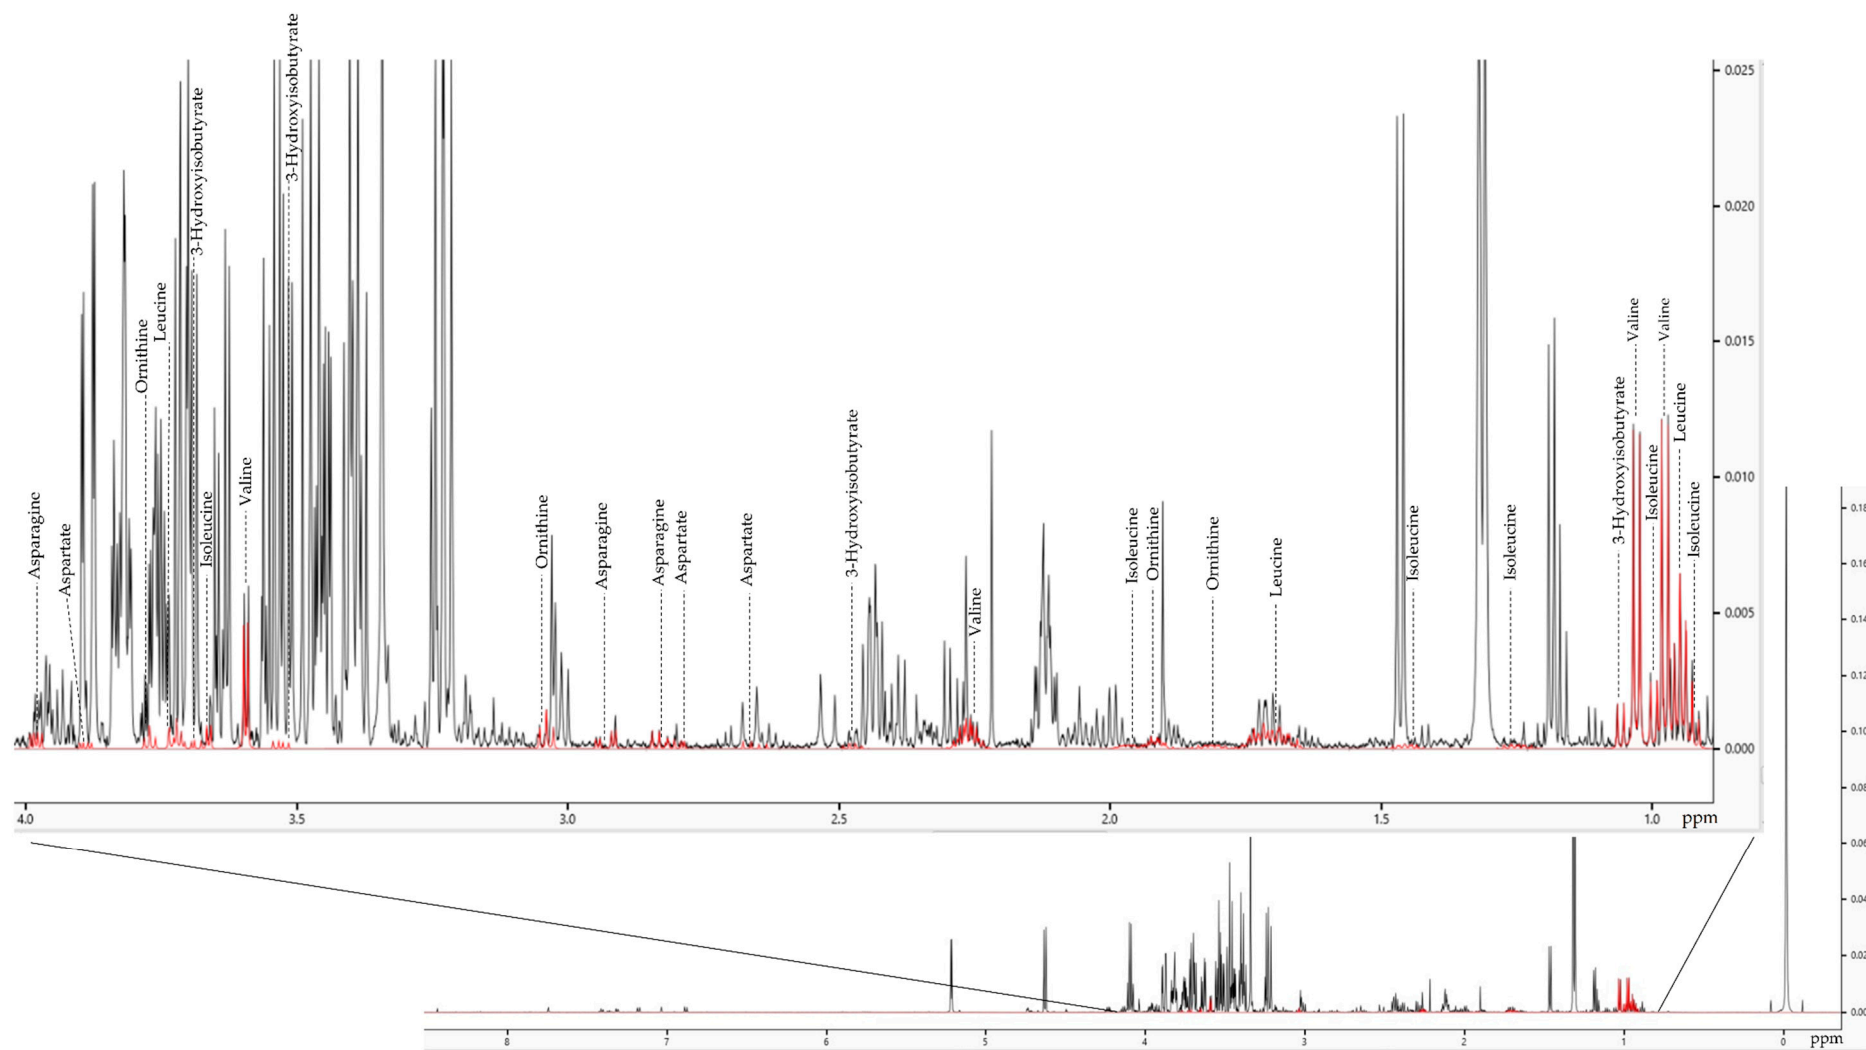

**Figure S3.** <sup>1</sup>H NMR spectrum with the main aging-associated serum metabolites highlighted in red, 14.1 T, 25°C in D<sub>2</sub>O. TMS-<sup>2</sup>H<sub>4</sub> was used as internal reference.

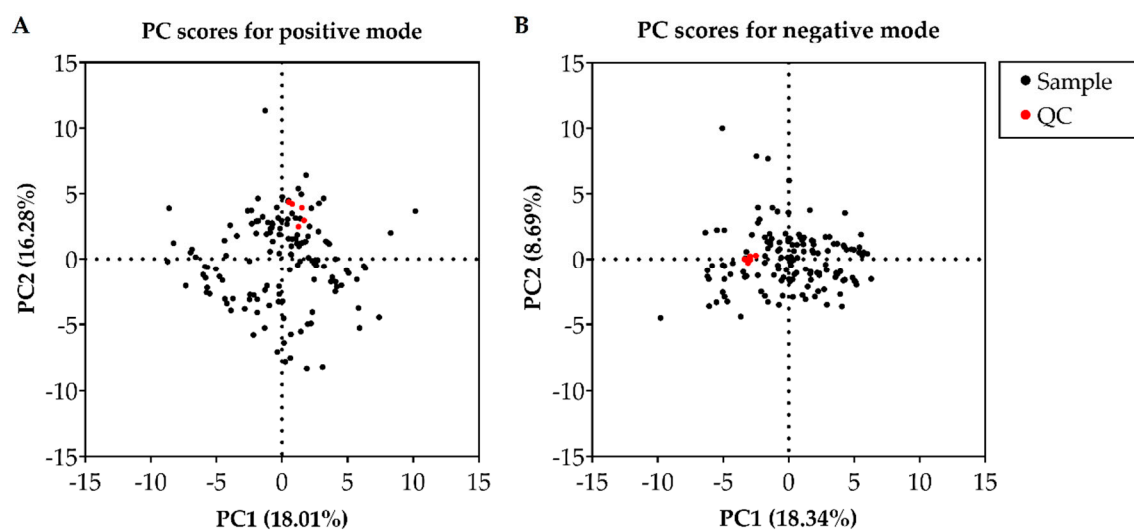

**Figure S4.** Instrumental stability assessed through quality control samples for data obtained by LC-HRMS in positive and negative ionization mode.

**Table S1.** Chemical structure and chemical shift ( $\delta$  - ppm) of compounds significantly associated with aging obtained by  $^1\text{H}$  NMR-based metabolomics.

| Nº  | Compounds and Structure  | $\delta$ $^1\text{H}$ ppm<br>(Multiplicity*, Nº H, J)                                                                                        | COSY<br>$^1\text{H}/^1\text{H}$                                                       | HSQC<br>$^{13}\text{C}/^1\text{H}$                                                           | HMBC                                                   |
|-----|--------------------------|----------------------------------------------------------------------------------------------------------------------------------------------|---------------------------------------------------------------------------------------|----------------------------------------------------------------------------------------------|--------------------------------------------------------|
| I   | Aspartate<br>            | 1. ---<br>2. 3.88-3.90 (m – 1H)<br>3. 2.65 (dd – 2H, 17.5 Hz, 8.88 Hz)<br>3. 2.80 (dd – 2H, 17.5 Hz, 3.64 Hz)<br>4. ---                      | 2. 3.88-3.90/2.65<br>2. 3.88-3.90/2.80                                                | Unobserved                                                                                   | 3. 182.0                                               |
| II  | Isoleucine<br>           | 1. ---<br>2. 3.66 (d – 1H)<br>3. 1.94-2.00 (m – 1H)<br>4. 1.24-1.45 (m – 2H)<br>5. 0.92 (t – 3H)<br>6. 0.99 (d – 3H, 7.02 Hz)                | 3. 1.94-2.00/1.45<br>5. 0.92/1.45<br>6. 0.99/1.94-2.00                                | 2. 62.7/3.66<br>5. 13.8/0.92<br>6. 17.6/0.99                                                 | 5. 27.7<br>6. 27.7; 38.9; 62.7                         |
| III | Leucine<br>              | 1. ---<br>2. 3.71-3.73 (m – 1H)<br>3. 1.65-1.75 (m – 2H)<br>4. 1.65-1.75 (m – 1H)<br>5. 0.94 (d – 3H, 6.60 Hz)<br>5'. 0.95 (d – 3H, 6.60 Hz) | 2. 3.71-3.73/1.72<br>5. 0.94/1.69<br>5'. 0.95/1.69                                    | 2. 56.2/3.71-3.73<br>3. 27.0/1.65-1.75<br>4. 42.8/1.65-1.75<br>5. 24.7/0.94<br>5'. 24.7/0.95 | 3. 42.8<br>5. 24.7; 27.0; 42.8<br>5'. 24.7; 27.0; 42.8 |
| IV  | 3-Hydroxyisobutyrate<br> | 1. ---<br>2. 2.44-2.50 (m – 1H)<br>3. 3.51-3.55 (m – 2H)<br>4. 1.06 (d – 3H, 7.15 Hz)                                                        | 2. 2.44-2.50/1.06                                                                     | 3. 3.51-3.55/65.5<br>4. 1.06/19.1                                                            | 3. 175.4                                               |
| V   | Valine<br>               | 1. ---<br>2. 3.59 (d – 1H, 4.50 Hz)<br>3. 2.22-2.30 (m)<br>4. 0.97 (d – 3H, 7.00 Hz)<br>4'. 1.03 (d – 3H, 7.00 Hz)                           | 4. 0.97/2.26<br>4'. 1.03/2.26                                                         | 2. 63.3/3.59<br>3. 31.3/2.22-2.30<br>4. 19.7/0.97<br>4'. 20.9/1.03                           | 4. 20.9; 31.3; 63.3<br>4'. 19.7; 31.3; 63.3            |
| VI  | Ornithine<br>            | 1. ---<br>2. 3.76-3.78 (m – 1H)<br>3. 1.88-1.97 (m – 2H)<br>4. 1.70-1.84 (m – 2H)<br>5. 3.04 (t – 2H, 7.46 Hz; 14.93 Hz)                     | 2. 3.76-3.78/1.88-1.97<br>3. 1.88-1.97/3.76-3.78<br>4. 1.70-1.84/3.04<br>5. 3.04/1.82 | 3. 1.88-1.97/30.5<br>5. 3.04/41.9                                                            | Unobserved                                             |
| VII | Asparagine<br>           | 1. ---<br>2. 3.97-3.99 (m – 1H)<br>3. 2.85 (dd – 1H, 4.2 Hz, 16.9 Hz)<br>3. 2.95 (dd – 1H, 8.0 Hz, 16.9 Hz)<br>4. ---                        | 3. 2.85/3.99                                                                          | 2. 3.97-3.99/57.9                                                                            | Unobserved                                             |

singlet (s); doublet (d); triplet (t); multiplet (m).

**Table S2.** Identification parameters of the compounds significantly associated ( $P < 0.05$  and  $< \text{FDR}$ ) with aging obtained by LC-HRMS-based metabolomics.

| Compound   | HMDB code   | Formula                                          | Monoisotopic Mass | Ion      | $m/z$    | Matched fragment ions (ppm error)                                                                                      |
|------------|-------------|--------------------------------------------------|-------------------|----------|----------|------------------------------------------------------------------------------------------------------------------------|
| Tryptophan | HMDB0030396 | $\text{C}_{11}\text{H}_{12}\text{N}_2\text{O}_2$ | 204.0898          | M-H-     | 203.0825 | 74.0243 (1.3 ppm); 116.0502 (1.5 ppm); 142.0663 (4.4 ppm); 159.0933 (6.7 ppm); 186.0563 (4.2 ppm); 203.0825 (2.2 ppm). |
| Unknown    | -           | -                                                | -                 | Negative | 129.0558 | -                                                                                                                      |
| Unknown    | -           | -                                                | -                 | Negative | 537.4146 | -                                                                                                                      |
| Unknown    | -           | -                                                | -                 | Negative | 130.0886 | -                                                                                                                      |

FDR: False discovery rate.

**Table S3.** Correlations between clinical markers and age.

| Clinical markers  | Correlation coefficient (r) | P-value | FDR    | Decision |
|-------------------|-----------------------------|---------|--------|----------|
| Total cholesterol | 0.37                        | 0.0002  | 0.0200 | SIG      |
| LDL               | 0.24                        | 0.0184  | 0.0400 | SIG      |
| HDL               | 0.22                        | 0.0343  | 0.0600 | SIG      |
| VLDL              | 0.21                        | 0.0388  | 0.0800 | SIG      |
| Glucose           | 0.21                        | 0.0394  | 0.1000 | SIG      |
| Triacylglyceride  | 0.21                        | 0.0404  | 0.1200 | SIG      |
| Ureia             | 0.19                        | 0.0639  | 0.1400 | SIG      |
| hs-CRP            | 0.15                        | 0.1632  | 0.1600 | NS       |
| Creatinine        | 0.07                        | 0.5033  | 0.1800 | NS       |
| Uric acid         | -0.01                       | 0.9149  | 0.2000 | NS       |

FDR: False discovery rate. SIG:  $P < 0.05$  and  $< \text{FDR}$ ; NS:  $P > 0.05$  and/or  $> \text{FDR}$ .



**Table S4.** Correlations between obtained compounds by LC-HRMS and age.

| Compounds [retention time (s):mass-to-charge ratio (m/z)] | Ionization mode | Correlation coefficient (r) | P-value | FDR    | Decision |
|-----------------------------------------------------------|-----------------|-----------------------------|---------|--------|----------|
| 815.1 : 129.056                                           | Negative        | 0.47                        | 0.0000  | 0.0016 | SIG      |
| 1340.5 : 537.416                                          | Negative        | -0.34                       | 0.0009  | 0.0031 | SIG      |
| 1351.1 : 467.374                                          | Negative        | -0.29                       | 0.0053  | 0.0047 | NS       |
| 511.3 : 203.083                                           | Negative        | -0.29                       | 0.0053  | 0.0063 | SIG      |
| 663.0 : 178.051                                           | Negative        | 0.27                        | 0.0079  | 0.0078 | NS       |
| 141.7 : 130.087                                           | Negative        | 0.27                        | 0.0079  | 0.0094 | SIG      |
| 942.5 : 1086.177                                          | Positive        | 0.25                        | 0.0162  | 0.0109 | NS       |
| 1232.8 : 586.314                                          | Negative        | 0.24                        | 0.0179  | 0.0125 | NS       |
| 1445.7 : 593.478                                          | Negative        | -0.24                       | 0.0215  | 0.0141 | NS       |
| 853.5 : 619.751                                           | Positive        | 0.23                        | 0.0277  | 0.0156 | NS       |
| 854.0 : 617.738                                           | Negative        | 0.21                        | 0.0413  | 0.0172 | NS       |
| 803.9 : 655.280                                           | Positive        | 0.21                        | 0.0464  | 0.0188 | NS       |
| 1294.9 : 746.442                                          | Positive        | -0.20                       | 0.0530  | 0.0203 | NS       |
| 1395.1 : 868.598                                          | Positive        | 0.19                        | 0.0615  | 0.0219 | NS       |
| 808.9 : 653.267                                           | Negative        | 0.19                        | 0.0653  | 0.0234 | NS       |
| 720.7 : 195.088                                           | Positive        | 0.19                        | 0.0656  | 0.0250 | NS       |
| 617.1 : 942.343                                           | Negative        | 0.18                        | 0.0865  | 0.0266 | NS       |
| 1404.2 : 652.499                                          | Positive        | 0.18                        | 0.0884  | 0.0281 | NS       |
| 1413.5 : 916.656                                          | Positive        | 0.18                        | 0.0900  | 0.0297 | NS       |
| 854.1 : 1236.480                                          | Negative        | 0.16                        | 0.1145  | 0.0313 | NS       |
| 1186.9 : 802.560                                          | Negative        | -0.16                       | 0.1227  | 0.0328 | NS       |
| 73.1 : 118.087                                            | Positive        | -0.16                       | 0.1292  | 0.0344 | NS       |
| 1045.0 : 612.330                                          | Negative        | -0.15                       | 0.1424  | 0.0359 | NS       |
| 92.9 : 167.021                                            | Negative        | -0.15                       | 0.1465  | 0.0375 | NS       |
| 1066.4 : 415.211                                          | Positive        | -0.14                       | 0.1673  | 0.0391 | NS       |
| 1302.9 : 599.381                                          | Positive        | -0.14                       | 0.1685  | 0.0406 | NS       |
| 120.1 : 191.020                                           | Negative        | 0.14                        | 0.1828  | 0.0422 | NS       |
| 1099.3 : 380.255                                          | Positive        | 0.14                        | 0.1910  | 0.0438 | NS       |
| 1056.9 : 568.361                                          | Negative        | -0.13                       | 0.2105  | 0.0453 | NS       |
| 1403.2 : 564.446                                          | Positive        | 0.13                        | 0.2207  | 0.0469 | NS       |
| 136.3 : 180.067                                           | Negative        | -0.13                       | 0.2274  | 0.0484 | NS       |
| 1427.1 : 853.522                                          | Positive        | -0.12                       | 0.2323  | 0.0500 | NS       |
| 1373.3 : 281.248                                          | Negative        | 0.12                        | 0.2479  | 0.0516 | NS       |
| 1364.0 : 833.505                                          | Positive        | -0.12                       | 0.2554  | 0.0531 | NS       |
| 1000.5 : 228.196                                          | Positive        | -0.12                       | 0.2576  | 0.0547 | NS       |
| 1411.1 : 872.630                                          | Positive        | 0.12                        | 0.2652  | 0.0563 | NS       |
| 89.9 : 162.839                                            | Negative        | 0.11                        | 0.2840  | 0.0578 | NS       |
| 386.5 : 117.056                                           | Negative        | -0.11                       | 0.2997  | 0.0594 | NS       |
| 1301.2 : 708.416                                          | Positive        | 0.11                        | 0.3053  | 0.0609 | NS       |
| 1076.4 : 183.080                                          | Positive        | -0.10                       | 0.3228  | 0.0625 | NS       |
| 1405.0 : 696.525                                          | Positive        | 0.10                        | 0.3228  | 0.0641 | NS       |
| 1373.5 : 381.174                                          | Negative        | 0.10                        | 0.3355  | 0.0656 | NS       |
| 270.0 : 164.072                                           | Negative        | 0.10                        | 0.3362  | 0.0672 | NS       |
| 1145.2 : 500.278                                          | Negative        | 0.10                        | 0.3396  | 0.0688 | NS       |
| 912.6 : 119.086                                           | Positive        | -0.10                       | 0.3518  | 0.0703 | NS       |

|                  |          |       |        |        |    |
|------------------|----------|-------|--------|--------|----|
| 797.6 : 173.082  | Negative | -0.09 | 0.3696 | 0.0719 | NS |
| 941.4 : 1102.185 | Positive | -0.09 | 0.3895 | 0.0734 | NS |
| 1059.0 : 452.203 | Positive | -0.09 | 0.3903 | 0.0750 | NS |
| 460.7 : 145.051  | Negative | -0.09 | 0.3940 | 0.0766 | NS |
| 1043.5 : 538.315 | Negative | -0.09 | 0.3944 | 0.0781 | NS |
| 1381.3 : 686.444 | Positive | 0.08  | 0.4328 | 0.0797 | NS |
| 1283.1 : 686.358 | Positive | -0.08 | 0.4408 | 0.0813 | NS |
| 1043.8 : 484.228 | Positive | 0.08  | 0.4451 | 0.0828 | NS |
| 1402.5 : 395.275 | Negative | 0.08  | 0.4548 | 0.0844 | NS |
| 1445.1 : 310.310 | Positive | -0.08 | 0.4554 | 0.0859 | NS |
| 912.6 : 147.080  | Positive | -0.08 | 0.4616 | 0.0875 | NS |
| 1090.5 : 540.331 | Negative | -0.08 | 0.4703 | 0.0891 | NS |
| 1143.7 : 614.346 | Negative | -0.07 | 0.4863 | 0.0906 | NS |
| 1303.7 : 279.233 | Negative | 0.07  | 0.4881 | 0.0922 | NS |
| 1406.6 : 100.933 | Negative | 0.07  | 0.4912 | 0.0938 | NS |
| 1159.3 : 476.278 | Negative | 0.07  | 0.4971 | 0.0953 | NS |
| 1035.8 : 293.176 | Negative | 0.07  | 0.5095 | 0.0969 | NS |
| 1482.6 : 773.507 | Positive | -0.07 | 0.5256 | 0.0984 | NS |
| 1316.9 : 775.463 | Positive | 0.07  | 0.5288 | 0.1000 | NS |
| 778.8 : 516.301  | Positive | -0.07 | 0.5290 | 0.1016 | NS |
| 1443.2 : 744.485 | Positive | -0.07 | 0.5331 | 0.1031 | NS |
| 842.1 : 696.773  | Negative | -0.06 | 0.5374 | 0.1047 | NS |
| 1286.6 : 303.233 | Negative | 0.06  | 0.5619 | 0.1063 | NS |
| 1444.2 : 284.295 | Positive | 0.06  | 0.5765 | 0.1078 | NS |
| 772.0 : 731.317  | Negative | -0.06 | 0.5804 | 0.1094 | NS |
| 1464.2 : 283.264 | Negative | 0.06  | 0.5972 | 0.1109 | NS |
| 1323.5 : 766.458 | Positive | -0.05 | 0.6034 | 0.1125 | NS |
| 716.9 : 265.118  | Positive | 0.05  | 0.6078 | 0.1141 | NS |
| 1396.9 : 824.501 | Positive | -0.05 | 0.6159 | 0.1156 | NS |
| 64.7 : 145.062   | Negative | -0.05 | 0.6207 | 0.1172 | NS |
| 1016.4 : 187.007 | Negative | 0.05  | 0.6254 | 0.1188 | NS |
| 1400.2 : 350.211 | Positive | -0.05 | 0.6279 | 0.1203 | NS |
| 87.1 : 89.024    | Negative | 0.05  | 0.6293 | 0.1219 | NS |
| 156.5 : 103.040  | Negative | -0.05 | 0.6314 | 0.1234 | NS |
| 1330.3 : 282.280 | Positive | 0.05  | 0.6342 | 0.1250 | NS |
| 1119.9 : 636.260 | Negative | -0.05 | 0.6458 | 0.1266 | NS |
| 925.2 : 583.256  | Negative | -0.05 | 0.6618 | 0.1281 | NS |
| 839.4 : 663.266  | Positive | 0.05  | 0.6635 | 0.1297 | NS |
| 772.7 : 432.280  | Positive | -0.04 | 0.6749 | 0.1313 | NS |
| 52.3 : 158.978   | Negative | 0.04  | 0.6762 | 0.1328 | NS |
| 1429.2 : 359.315 | Positive | -0.04 | 0.6791 | 0.1344 | NS |
| 840.6 : 698.786  | Positive | -0.04 | 0.6846 | 0.1359 | NS |
| 106.0 : 169.036  | Positive | -0.04 | 0.6898 | 0.1375 | NS |
| 758.8 : 388.254  | Positive | 0.04  | 0.6986 | 0.1391 | NS |
| 847.6 : 187.097  | Negative | -0.04 | 0.7010 | 0.1406 | NS |
| 788.6 : 560.327  | Positive | 0.04  | 0.7043 | 0.1422 | NS |
| 1353.5 : 657.423 | Positive | -0.04 | 0.7072 | 0.1438 | NS |
| 1465.0 : 383.189 | Negative | -0.04 | 0.7123 | 0.1453 | NS |
| 1264.2 : 271.228 | Negative | 0.04  | 0.7292 | 0.1469 | NS |

|                  |          |       |        |        |    |
|------------------|----------|-------|--------|--------|----|
| 1347.0 : 795.479 | Positive | -0.04 | 0.7315 | 0.1484 | NS |
| 1186.7 : 298.274 | Positive | -0.04 | 0.7322 | 0.1500 | NS |
| 1320.0 : 256.264 | Positive | 0.03  | 0.7465 | 0.1516 | NS |
| 1322.2 : 737.437 | Positive | 0.03  | 0.7495 | 0.1531 | NS |
| 1345.7 : 766.459 | Positive | -0.03 | 0.7528 | 0.1547 | NS |
| 1011.6 : 158.154 | Positive | -0.03 | 0.7742 | 0.1563 | NS |
| 89.6 : 164.836   | Negative | 0.03  | 0.7852 | 0.1578 | NS |
| 1371.2 : 824.500 | Positive | 0.03  | 0.7892 | 0.1594 | NS |
| 1363.1 : 255.233 | Negative | 0.03  | 0.7911 | 0.1609 | NS |
| 1410.7 : 144.923 | Negative | 0.03  | 0.8088 | 0.1625 | NS |
| 767.3 : 603.791  | Positive | -0.02 | 0.8178 | 0.1641 | NS |
| 1032.2 : 452.203 | Positive | 0.02  | 0.8227 | 0.1656 | NS |
| 1086.4 : 532.300 | Negative | 0.02  | 0.8264 | 0.1672 | NS |
| 809.8 : 692.405  | Positive | -0.02 | 0.8278 | 0.1688 | NS |
| 1398.8 : 853.521 | Positive | 0.02  | 0.8344 | 0.1703 | NS |
| 1394.0 : 384.346 | Positive | -0.02 | 0.8355 | 0.1719 | NS |
| 1326.0 : 628.403 | Positive | -0.02 | 0.8427 | 0.1734 | NS |
| 117.3 : 199.805  | Negative | -0.02 | 0.8497 | 0.1750 | NS |
| 1369.7 : 795.480 | Positive | 0.02  | 0.8498 | 0.1766 | NS |
| 1469.4 : 583.256 | Negative | 0.02  | 0.8602 | 0.1781 | NS |
| 797.6 : 604.353  | Positive | -0.02 | 0.8694 | 0.1797 | NS |
| 1020.8 : 426.186 | Positive | 0.02  | 0.8706 | 0.1813 | NS |
| 799.9 : 702.510  | Positive | 0.02  | 0.8735 | 0.1828 | NS |
| 1362.9 : 355.158 | Negative | -0.01 | 0.8894 | 0.1844 | NS |
| 840.6 : 717.758  | Positive | -0.01 | 0.8959 | 0.1859 | NS |
| 119.9 : 195.811  | Negative | 0.01  | 0.9227 | 0.1875 | NS |
| 1310.5 : 379.158 | Negative | -0.01 | 0.9268 | 0.1891 | NS |
| 1102.1 : 378.241 | Negative | 0.01  | 0.9294 | 0.1906 | NS |
| 1031.8 : 161.096 | Positive | 0.01  | 0.9336 | 0.1922 | NS |
| 59.0 : 112.986   | Negative | -0.01 | 0.9344 | 0.1938 | NS |
| 1141.6 : 426.357 | Positive | -0.01 | 0.9370 | 0.1953 | NS |
| 803.4 : 648.379  | Positive | 0.01  | 0.9383 | 0.1969 | NS |
| 115.6 : 128.035  | Negative | 0.01  | 0.9612 | 0.1984 | NS |
| 1307.1 : 337.166 | Positive | 0.00  | 0.9936 | 0.2000 | NS |

---

FDR: False discovery rate; SIG:  $P < 0.05$  and  $< \text{FDR}$ ; NS:  $P > 0.05$  and/or  $> \text{FDR}$ .

**Table S5.** Correlations between obtained compounds by <sup>1</sup>H NMR and age.

| Compounds*             | <sup>1</sup> H chemical shift (δ - ppm) used as reference for quantification | Correlation coefficient (r) | P-value | FDR     | Decision |
|------------------------|------------------------------------------------------------------------------|-----------------------------|---------|---------|----------|
| Threonine              | 4.23                                                                         | -0.281                      | 0.00615 | 0.00435 | NS       |
| Isoleucine             | 0.99                                                                         | -0.280                      | 0.00636 | 0.00870 | SIG      |
| Ornithine              | 3.04                                                                         | 0.269                       | 0.00876 | 0.01304 | SIG      |
| 3-Hydroxyisobutyrate   | 1.05                                                                         | -0.257                      | 0.01251 | 0.01739 | SIG      |
| Aspartate              | 2.66                                                                         | 0.237                       | 0.02143 | 0.02174 | SIG      |
| Succinate              | 2.39                                                                         | 0.226                       | 0.02880 | 0.02609 | NS       |
| Valine                 | 0.97                                                                         | 0.225                       | 0.02892 | 0.03043 | SIG      |
| Dimethylsulfone        | 3.13                                                                         | 0.217                       | 0.03584 | 0.03478 | NS       |
| Leucine                | 0.95                                                                         | -0.215                      | 0.03754 | 0.03913 | SIG      |
| Asparagine             | 2.92                                                                         | -0.214                      | 0.03793 | 0.04348 | SIG      |
| Acetoacetate           | 2.26                                                                         | -0.189                      | 0.06755 | 0.04783 | NS       |
| Choline                | 3.19                                                                         | 0.173                       | 0.09512 | 0.05217 | NS       |
| Glycine                | 3.54                                                                         | 0.164                       | 0.11422 | 0.05652 | NS       |
| Lactate                | 1.31                                                                         | 0.155                       | 0.13561 | 0.06087 | NS       |
| Histidine              | 7.74                                                                         | -0.147                      | 0.15693 | 0.06522 | NS       |
| Methionine             | 2.63                                                                         | -0.146                      | 0.16032 | 0.06957 | NS       |
| Sarcosine              | 2.72                                                                         | 0.142                       | 0.17257 | 0.07391 | NS       |
| Alanine                | 1.46                                                                         | -0.127                      | 0.22249 | 0.07826 | NS       |
| Anserine               | 6.97                                                                         | -0.127                      | 0.22249 | 0.08261 | NS       |
| Glucose                | 5.22                                                                         | 0.119                       | 0.25292 | 0.08696 | NS       |
| 2-Hydroxyisovalerate   | 0.82                                                                         | -0.114                      | 0.27285 | 0.09130 | NS       |
| O-Acetylcarnitine      | 3.18                                                                         | 0.108                       | 0.30160 | 0.09565 | NS       |
| Glutamine              | 2.46                                                                         | -0.098                      | 0.34895 | 0.10000 | NS       |
| 3-Methyl-2-oxovalerate | 0.88                                                                         | 0.096                       | 0.35938 | 0.10435 | NS       |
| Ascorbate              | 4.49                                                                         | 0.095                       | 0.35993 | 0.10870 | NS       |
| Citrate                | 2.68                                                                         | 0.095                       | 0.36189 | 0.11304 | NS       |
| Formate                | 8.44                                                                         | 0.084                       | 0.42155 | 0.11739 | NS       |
| Serine                 | 3.94                                                                         | -0.079                      | 0.45086 | 0.12174 | NS       |
| 3-Hydroxybutyrate      | 1.18                                                                         | 0.078                       | 0.45212 | 0.12609 | NS       |
| Lysine                 | 3.01                                                                         | 0.076                       | 0.46494 | 0.13043 | NS       |
| N,N-Dimethylglycine    | 2.91                                                                         | 0.073                       | 0.48235 | 0.13478 | NS       |
| 2-Oxoisocaproate       | 0.92                                                                         | -0.069                      | 0.50582 | 0.13913 | NS       |
| 2-Oxoglutarate         | 2.99                                                                         | -0.068                      | 0.51264 | 0.14348 | NS       |
| Creatinine             | 3.03                                                                         | -0.065                      | 0.53471 | 0.14783 | NS       |
| Tyrosine               | 6.88                                                                         | 0.061                       | 0.56182 | 0.15217 | NS       |
| Acetate                | 1.9                                                                          | -0.051                      | 0.62723 | 0.15652 | NS       |
| 2-Hydroxybutyrate      | 0.88                                                                         | -0.034                      | 0.74240 | 0.16087 | NS       |
| Glycerol               | 3.55                                                                         | -0.026                      | 0.80308 | 0.16522 | NS       |
| Proline                | 2.06                                                                         | 0.025                       | 0.80902 | 0.16957 | NS       |
| Betaine                | 3.25                                                                         | -0.016                      | 0.87928 | 0.17391 | NS       |
| Hypoxanthine           | 8.17                                                                         | 0.015                       | 0.88626 | 0.17826 | NS       |
| Phenylalanine          | 7.42                                                                         | -0.011                      | 0.91870 | 0.18261 | NS       |
| Dimethylamine          | 2.71                                                                         | 0.005                       | 0.96366 | 0.18696 | NS       |
| Trimethylamine         | 2.89                                                                         | -0.005                      | 0.96373 | 0.19130 | NS       |
| Creatine               | 3.02                                                                         | 0.002                       | 0.98269 | 0.19565 | NS       |
| Pyruvate               | 2.35                                                                         | -0.001                      | 0.98871 | 0.20000 | NS       |

\* Characterization performed based on predicted hydrogen chemical shift using Chenomx software. FDR: False discovery rate; SIG: P < 0.05 and < FDR; NS: P > 0.05 and/or > FDR.

**Table S6.** Summary of metabolic pathways associated with aging after Metabolite Set Enrichment Analysis.

| Metabolic Pathways                          | Total | Expected | Hits | P-value | Enrichment ratio* |
|---------------------------------------------|-------|----------|------|---------|-------------------|
| Valine, leucine and isoleucine degradation  | 60    | 0.645    | 4    | 0.0026  | 6.20              |
| Urea cycle                                  | 29    | 0.312    | 2    | 0.0364  | 6.41              |
| Ammonia recycling                           | 32    | 0.344    | 2    | 0.0437  | 5.81              |
| Aspartate metabolism                        | 35    | 0.376    | 2    | 0.0515  | 5.32              |
| Lactose degradation                         | 9     | 0.0967   | 1    | 0.0930  | 10.34             |
| Malate-aspartate shuttle                    | 10    | 0.107    | 1    | 0.1030  | 9.35              |
| Arginine and proline metabolism             | 53    | 0.569    | 2    | 0.1070  | 3.51              |
| Glucose-alanine cycle                       | 13    | 0.14     | 1    | 0.1320  | 7.14              |
| Spermidine and spermine biosynthesis        | 18    | 0.193    | 1    | 0.1780  | 5.18              |
| Lactose synthesis                           | 20    | 0.215    | 1    | 0.1960  | 4.65              |
| Transfer of acetyl groups into mitochondria | 22    | 0.236    | 1    | 0.2130  | 4.24              |
| Glycolysis                                  | 25    | 0.269    | 1    | 0.2390  | 3.72              |
| Beta-alanine metabolism                     | 34    | 0.365    | 1    | 0.3120  | 2.74              |
| Gluconeogenesis                             | 35    | 0.376    | 1    | 0.3190  | 2.66              |
| Galactose metabolism                        | 38    | 0.408    | 1    | 0.3420  | 2.45              |
| Sphingolipid metabolism                     | 40    | 0.43     | 1    | 0.3560  | 2.33              |
| Propanoate metabolism                       | 42    | 0.451    | 1    | 0.3710  | 2.22              |
| Steroidogenesis                             | 43    | 0.462    | 1    | 0.3780  | 2.16              |
| Steroid biosynthesis                        | 48    | 0.516    | 1    | 0.4120  | 1.94              |
| Glutamate metabolism                        | 49    | 0.526    | 1    | 0.4180  | 1.90              |
| Warburg effect                              | 58    | 0.623    | 1    | 0.4750  | 1.61              |
| Glycine and serine metabolism               | 59    | 0.634    | 1    | 0.4810  | 1.58              |
| Tryptophan metabolism                       | 60    | 0.645    | 1    | 0.4870  | 1.55              |
| Bile acid biosynthesis                      | 65    | 0.698    | 1    | 0.5160  | 1.43              |
| Tyrosine metabolism                         | 72    | 0.773    | 1    | 0.5530  | 1.29              |
| Purine metabolism                           | 74    | 0.795    | 1    | 0.5640  | 1.26              |

\*Pathway enrichment ratio is computed by Hits/Expected Hits.
